# Supplementary material
Source: publisher site journal article supplement (https://www.dovepress.com/get_supplementary_file.php?f=246957.xlsx)
Supplement: Supplementary file 1 [file get_supplementary_file.php]

## Sheet: Sheet1
Primer
miRNA-F: 5'-CCTACGCCACAATTAACAAGCC-3', R: 5'-GCCGTCTAACACTGTCTGGTA-3'
circRNA-F: 5'-GACGTGCCCAGGCGTATTTC-3',R: 5'-AAGGTGGCTGGGTAGTGCATTC-3'
U6-F: 5'-GCTTCGGCAGCACATATACTAAAAT-3', R: 5'-CGCTTCACGAATTTGCGTGTCAT-3'
GAPDH-F: 5'-AACGTGTCAGTOGTGGACCTG-3', R: 5'-AGTGGGTGTCGCTGTFGAAGT-3'
Survival data
time	status	expression
965	1	2
883	1	1
863	1	1
840	1	1
821	1	2
814	1	1
806	1	1
791	1	1
765	1	2
740	1	2
735	1	2
731	1	2
728	1	2
717	1	1
707	2	1
700	1	1
705	1	2
689	1	1
687	1	2
655	1	1
654	2	2
643	1	1
641	1	2
624	1	1
613	2	1
588	1	2
583	1	1
574	1	1
567	1	1
559	1	2
558	1	1
551	1	2
550	1	2
543	1	2
533	2	1
529	1	2
524	2	2
523	1	1
520	1	2
519	1	1
511	1	2
511	1	2
487	1	1
477	1	1
473	2	2
470	1	1
460	2	1
458	1	1
457	1	1
455	1	1
450	1	2
446	1	2
444	1	1
442	1	1
440	1	1
433	1	2
429	1	1
428	2	1
426	1	2
413	1	1
404	1	1
394	1	1
390	1	1
387	2	1
384	1	2
382	1	2
376	1	2
371	2	1
371	1	2
364	1	1
364	1	2
363	1	2
363	1	1
362	1	1
361	1	2
356	1	2
353	2	1
353	1	1
352	1	1
351	1	2
350	1	1
348	1	2
345	2	2
340	2	2
337	2	1
332	1	2
329	1	1
320	1	1
315	1	2
310	2	2
310	1	1
306	1	1
305	1	2
303	1	1
303	1	1
301	2	1
301	1	1
300	1	1
296	1	2
293	2	2
292	1	1
292	1	2
291	1	1
285	2	1
285	2	2
284	1	2
284	1	1
283	2	1
279	1	1
276	1	2
272	1	2
270	1	1
269	1	2
269	1	1
268	1	2
267	1	1
266	1	2
259	1	1
252	1	2
246	2	1
245	1	2
244	1	1
243	1	2
240	1	2
239	2	1
239	1	2
237	2	1
235	1	2
230	2	1
229	1	1
226	2	2
225	1	1
225	1	1
224	1	2
211	1	2
210	2	1
208	2	2
207	2	1
203	1	2
202	2	1
202	1	2
201	1	2
201	1	2
199	2	2
197	2	1
197	1	1
196	1	1
194	2	2
192	1	2
191	1	1
189	2	1
188	1	1
186	2	2
185	1	1
183	2	1
182	2	2
181	1	1
181	2	1
180	2	1
179	2	1
179	2	1
177	2	1
177	1	2
176	2	1
175	2	1
175	1	2
174	1	1
173	1	2
170	2	1
167	2	2
166	1	1
166	2	2
163	2	1
163	2	1
163	2	1
156	2	1
156	2	1
150	1	2
147	1	2
151	1	2
147	2	1
145	2	2
145	2	2
144	2	1
142	1	1
135	2	1
132	2	1
132	2	1
131	2	1
122	2	2
118	1	1
116	2	1
110	2	1
107	2	2
107	2	1
105	2	1
105	1	2
95	2	2
95	2	1
93	2	1
92	2	1
92	1	2
88	2	1
88	2	1
81	1	2
81	2	1
79	1	2
71	2	1
65	2	1
65	2	1
62	2	2
61	2	2
60	1	2
60	1	1
59	2	1
54	2	1
53	2	1
53	2	1
31	2	1
30	2	1
26	1	2
53	1	2
31	1	2
30	1	2
26	1	2
15	1	1
13	2	1
13	2	1
12	2	1
11	2	1
11	2	1
11	2	1
5	2	2
